# Supplementary material
Source: publisher site journal article supplement (https://www.dovepress.com/get_supplementary_file.php?f=223473.xlsx)
Supplement: Supplementary file 1 [file get_supplementary_file.php]

## Sheet: Sheet1
List 1 The chi-squared test was employed to evaluate the relationship between the expression level of miR-520a-30p and clinical traits.
miR-520a-3p expression
Features		n	Low	High	X²	P-value
All cases		90	45	45
Age					0.179	0.673
	＜60	48	25	23
	≥60	42	20	22
Gender					0.045	0.832
	Man	51	25	26
	Female	39	20	19
Tumor size(cm)					1.667	0.197
	＜3	36	15	21
	≥3	54	30	24
Lymph node metastasis					5.374	0.02
	Negative	31	10	21
	Positive	59	35	24
TNM stage					11.66	0.001
	Ⅰand Ⅱ	38	11	27
	Ⅲ and Ⅳ	52	34	18
Distant metastasis					9.504	0.002
	Negative	32	9	23
	Positive	58	36	22
Local invasion					7.526	0.006
	T1,T2	47	17	30
	T3.T4	43	28	15
